# Supplementary material
Source: publisher figshare collection journal article supplement (https://future-science-group.figshare.com/articles/dataset/_/21896166)
Supplement: Supplementary file 1 [file 1]

Table.S1 Particle sizes, Zeta potential and polydispersity index (PDI) of the copolymer nanoparticles

|  | Particle size (nm) | Zeta(mV) | PDI |
| --- | --- | --- | --- |
| PLGA | 176.1±3.4 | -21.3±1.9 | 0.15±0.03 |
| PLGA-*b*-P | 198.3±1.2 | -23.5±2.5 | 0.12±0.02 |
| PTX-PLGA-*b*-P | 262.6±1.1 | -24.5±1.5 | 0.10±0.03 |
